# 1                    **Familiarity Facilitates Feature-based Face Processing**

2

3   **Matteo Visconti di Oleggio Castello<sup>1,\*</sup>, Kelsey G. Wheeler<sup>1</sup>,**

4   **Carlo Cipolli<sup>2</sup>, M. Ida Gobbini<sup>1,2,\*</sup>**

5   <sup>1</sup>Department of Psychological and Brain Sciences, Dartmouth College, Hanover NH 03755, USA

6   <sup>2</sup>Dipartimento di Medicina Specialistica, Diagnostica e Sperimentale (DIMES), Medical School,

7   University of Bologna, 40126 Bologna, Italy

8

9   **\* Correspondence:**

10   M. Ida Gobbini

11   [mariaida.gobbini@unibo.it](mailto:mariaida.gobbini@unibo.it); [maria.i.gobbini@dartmouth.edu](mailto:maria.i.gobbini@dartmouth.edu)

12   Matteo Visconti di Oleggio Castello

13   [mvdoc.gr@dartmouth.edu](mailto:mvdoc.gr@dartmouth.edu)

14

15   **Keywords:** personally familiar faces; visual search; configural processing; feature-based  
16   processing; face inversion.

17

## 18 **Abstract**

19 Recognition of personally familiar faces is remarkably efficient, effortless and robust. We asked  
20 if feature-based face processing facilitates detection of familiar faces by testing the effect of face  
21 inversion on a visual search task for familiar and unfamiliar faces. Because face inversion  
22 disrupts configural and holistic face processing, we hypothesized that inversion would diminish  
23 the familiarity advantage to the extent that it is mediated by such processing. Subjects detected  
24 personally familiar and stranger target faces in arrays of two, four, or six face images. Subjects  
25 showed significant facilitation of personally familiar face detection for both upright and inverted  
26 faces. The effect of familiarity on target absent trials, which involved only rejection of unfamiliar  
27 face distractors, suggests that familiarity facilitates rejection of unfamiliar distractors as well as  
28 detection of familiar targets. The preserved familiarity effect for inverted faces suggests that  
29 facilitation of face detection afforded by familiarity reflects mostly feature-based processes.

30

31

32

33

## 34 **Introduction**

35 Humans are thought to be face-experts. We are able to draw important information from faces  
36 such as emotions from facial expressions [1,2], direction of attention from eye gaze and head  
37 position [1,2], and recognition of identity [3], [4]. When focusing on face identity, human  
38 performance is dramatically different for familiar and unfamiliar faces. Despite the subjective  
39 impression of efficient or “expert” perception of faces in general, performance accuracy when  
40 discriminating unfamiliar face identities or perceiving that different images are of the same  
41 unfamiliar identity are markedly worse than for familiar faces [3,5–12].

42

43 In previous work, we showed that personally familiar faces have a more robust representation as  
44 compared to unfamiliar faces for both early detection and perception of social cues. Familiar as  
45 compared to unfamiliar faces can be detected with reduced attentional resources and can be  
46 processed without conscious awareness [13]. Moreover, social cues, such as eye-gaze or head  
47 orientation, are processed faster when conveyed by familiar faces [14]. With a saccadic reaction  
48 paradigm, we found that participants were able to detect and shift their gaze to familiar faces in  
49 180 ms [15] when the distractors were faces of strangers, a latency shorter than the known  
50 evoked potentials that differentiate familiar from stranger faces [16]; but see [17]). Overall, these  
51 results highlight a difference in processing between familiar and unfamiliar faces and point to a

52 facilitation of familiar face processing that precedes the activation of a conscious, view-invariant  
53 representation [13,15], and that extends to the local features of a familiar face [12,14].

54

55 In order to test the hypothesis that fast and efficient detection of familiar faces relies primarily on  
56 feature-based processing, we assessed whether the advantage for familiar face detection persists  
57 for inverted faces. Face inversion has been used to demonstrate face-specific processing and the  
58 role of configural processing when faces are presented upright. Inverting a face disrupts  
59 configural and holistic processing, thereby increasing reliance on parts-based processing [18–  
60 31]). Faces are characterized by two types of relational/configurational properties: first-order  
61 relational properties (e.g.; eyes above the nose above the mouth) and second-order relational  
62 properties (e.g. spacing between the eyes) [32–34]. Another term used in the face literature for  
63 face processing is “holistic” [35], meaning that all face-parts are processed as a whole [36]. In  
64 the present experiment we hypothesized that if familiar face recognition exploits identity-specific  
65 local facial features, then the advantage for personally familiar faces should be maintained with  
66 face inversion. On the other hand, if familiar face recognition relies on holistic or configural  
67 processing, face inversion should eliminate the familiarity advantage. We used a visual search  
68 task for personally familiar and unfamiliar identities with upright and inverted faces. The results  
69 showed that the advantage for familiar faces persists also after inversion. We discuss these  
70 findings in terms of parts-based processing for efficient detection of personally familiar faces.

71

72

## 73 **Methods**

74 Raw data, analysis scripts, and presentation code are available at [LINK OMITTED WHILE  
75 UNDER REVIEW]

### 76 *Participants*

77 19 subjects (12 male, mean age: 24.79, SD 3.71) from three groups of friends participated in the  
78 experiment. No formal power estimate was computed to determine sample size, but we aimed for  
79 a sample size that was larger than that in a paper by Tong & Nakayama (1999, 8-16 subjects) on  
80 a visual search task for one's own face, while recruiting subjects that were highly familiar with  
81 the familiar stimuli. We chose friends that had extensive daily interaction with each other  
82 occurring for at least one year prior to the experiment. They were recruited from the Dartmouth  
83 College graduate and undergraduate community. All had normal or corrected-to-normal vision.  
84 Subjects were reimbursed for their participation; all gave written informed consent to use their  
85 pictures for research and to participate in the experiment in accordance with the Declaration of  
86 Helsinki. The Dartmouth Committee for the Protection of Human Subjects approved the  
87 experiment (Protocol 21200).

### 88 *Stimuli*

89 For each subject we created three sets of images: target familiar faces (two identities: one male,  
90 one female), target stranger faces (two identities: one male, one female), and distractor stranger  
91 faces (twelve identities: 6 male, 6 female). Prior to the experiment, subjects and their friends had  
92 their pictures taken to be used as stimuli in the experiment. To ensure that all stimuli were of  
93 equal image quality, pictures were taken in a photo studio with standardized lighting, camera

94 placement and camera settings. For each identity we used two different pictures taken in the  
95 same session to reduce image-specific learning. The familiar targets were chosen among the  
96 subject's friends. The pictures of the 14 stranger individuals (12 distractor identities and 2 target  
97 identities) were taken at the University of Vermont with the same lighting, camera placement  
98 and settings as used for subjects recruited at Dartmouth College. For each subject the two  
99 unfamiliar target identities were chosen randomly. Inverted stimuli were created by rotating the  
100 images 180°. Images were cropped and converted to grayscale using custom code written in  
101 Python on Mac OS X 10.9.5. The average pixel intensity of each image (ranging from 0 to 255)  
102 was set to 128 with a standard deviation of 40 using the SHINE toolbox (function *lumMatch*)  
103 [37] in MATLAB (R2014a).

104  
105 Stimuli for visual search trials consisted of two, four, or six face images positioned on the  
106 vertices of a regular hexagon centered on the fixation point, such that the center of each image  
107 was 7° of visual angle from the fixation point. Each image subtended 4° x 4° of visual angle. The  
108 position of the stimuli always created a shape symmetrical with respect to the fixation point (see  
109 Fig 1). All face images for each block were either upright or inverted.

110  
111 **Fig 1. Experimental paradigm and example of the stimuli.** On each trial, a central fixation  
112 cross appeared for a jittered period between 800-1000 ms, followed by a visual search array of  
113 two, four, or six faces displayed for a maximum of three seconds.

114

## 115 *Experimental setup*

116 The experiment was run on a GNU/Linux workstation (Xubuntu 14.04 with low-latency kernel  
117 3.13, CPU AMD FX-4350 quad-core 4.2 GHz, 8GB RAM, AMD Radeon R9 270 video card  
118 with radeon drivers) and a DELL 2000FP screen, set at a resolution of 1600x1200 pixels with a  
119 60hz refresh rate, using Psychtoolbox (version 3.0.12) in MATLAB (R2014b). Subjects sat at a  
120 distance of approximately 50 cm from the screen (eyes to screen) in a dimly lit room.

## 121 *Task*

122 Subjects were briefly familiarized with the images used in the visual search task before starting  
123 the experiment. Images (both upright and inverted) were presented in random order. Each image  
124 was presented for two seconds. After the image disappeared, subjects were required to press a  
125 key to continue to the next image. They were instructed to carefully observe each face for the  
126 entire presentation and to continue at their own pace.

127

128 The visual search session consisted of eight blocks, with a short break after the first four blocks.  
129 In each block, subjects were instructed to search for one of the four target identities, with one  
130 upright and one inverted block for each identity. Within each block, all distractor faces were of  
131 the same sex and in the same orientation as the target images. Subjects responded as quickly and  
132 accurately as possible by pressing either the left-arrow key (target present) or the right arrow-key  
133 (target absent). They received feedback (a beep) if they responded incorrectly or did not respond  
134 within three seconds. No feedback was given for correct answers. Eye movements were  
135 explicitly allowed.

136

137 The order of blocks was counterbalanced for familiarity and face orientation within each subject.

138 Familiarity always changed from one block to the next, while inversion changed every two

139 blocks. Because of software error, the sex of the targets wasn't counterbalanced across subjects:

140 12/19 subjects had male targets in the first half of the experiment and female targets in the

141 second half (and the converse for the remaining 7/19 subjects).

142

143 Each block started with 24 practice trials followed immediately by 120 test trials. At the

144 beginning of each block, subjects were shown the target identity (upright or inverted) and

145 pressed a key to start the block. On each trial, a central fixation cross appeared for a jittered

146 period between 800-1000 ms, followed by a visual search array of two, four, or six faces

147 displayed for a maximum of three seconds.

148

149 Target images appeared in half of the trials. The target was equally likely to appear in the left or

150 right hemifield to avoid possible lateralization biases. Distractor faces were randomly chosen

151 from the set of six distractor identities, and all distractors were different from each other.

152 Stranger target identities never appeared as distractors. Each trial type was repeated 10 times in

153 each block (with distractors randomly sampled every time). Each block thus had 120 trials: 3

154 (Set Size) x 2 (Target Presence) x 20 (2 different target images x 10 repetitions). The order of the

155 trials within each block was randomized.



## 156 *Statistical Analyses*

157 The analyses were run in R (version 3.2.3). The code for all the analyses are available on the  
158 Open Science Framework website ([LINK OMITTED WHILE UNDER REVIEW]) as RMarkdown  
159 notebooks.

160

161 To assess statistical significance we fitted Generalized Mixed Models using the package *lme4*  
162 (version 1.1.11 [38]). Significance of the model parameters was tested using a Type 3 analysis of  
163 deviance (Wald's  $\chi^2$  test), as implemented in the package *car* ([39], version 2.1.1). We also used  
164 the following additional packages in our analyses:

- 165 • *dplyr* (version 0.4.3, [40])
- 166 • *ggplot2* (version 2.1.0, [41])
- 167 • *foreach* (version 1.4.3, [42])
- 168 • *doParallel* (version 1.0.10, Analytics and Weston, 2015b)
- 169 • *knitr* (version 1.12.3, [43–45])
- 170 • *assertthat* (version 0.1, Wickham, 2013)
- 171 • *broom* (version 0.4.0, Robinson, 2015)

172

173 We analyzed subjects' accuracies using Logit Mixed Models [46], and reaction times of correct  
174 trials only with Linear Mixed Models, separately for target present and target absent trials. For  
175 each model, we entered Set Size, Familiarity, and Target Orientation as main effects with all  
176 their interactions. The initial random-effect structure contained both subjects and items terms.

177 For the latter term we entered the combination of stimuli appearing on the screen regardless of  
178 their position. This allowed us to model the variance due to subject and item (specific images)  
179 differences. We also added an extra regressor that indicated the sex of the target, and added  
180 random slopes with respect to this term for both subjects and items. We considered this term as a  
181 covariate, and thus we didn't analyze it further.

182  
183 The initial random-effect structure was tested using a log-likelihood ratio test against reduced  
184 models (created by removing random slopes first). For the linear models on reaction times in  
185 both target present and absent trials, the final structure contained subjects with random slopes  
186 and intercepts, and items with random intercepts—the model with random slopes for items failed  
187 to converge, thus we used a less complex model. The final logit models on accuracies in target  
188 present trials had subjects with random intercepts only, while in target absent trials it had  
189 subjects with both random intercepts and slopes.

190  
191 After fitting the models with zero-sum contrasts for the regressors, we tested statistical  
192 significance of the fixed-effect terms using a Type 3 analysis of deviance (Wald's  $\chi^2$  test), as  
193 implemented in the package *car* [39]. For the models on reaction times we log-transformed the  
194 independent variable to account for the skewness of the distribution of reaction times; visually  
195 inspecting the predicted vs. residual plot confirmed that such a transformation provided a better  
196 fit for the model. The final linear model was refitted using restricted maximum likelihood  
197 estimation (REML).

198

199 We used a bootstrapping procedure [47] to investigate the direction of the significant effects  
200 found by the models. Trials were always bootstrapped maintaining the structure of the original  
201 dataset. For example, for any bootstrap sample the number of trials within each subject and  
202 condition (Set Size, Target Presence, Target Orientation, Familiarity, and Target Sex) was  
203 preserved, and trials were sampled with replacement only within the appropriate subject and  
204 condition. For the next sections, numbers in square brackets represent 95% basic bootstrapped  
205 confidence intervals (CI) after 10,000 replications.

206  
207 We also estimated Set Size 1 intercept and search slopes—which provide information about  
208 target-recognition and distractor-rejection processes (Tong & Nakayama 1999)—by fitting a  
209 regression line for each subject and condition separately. To obtain 95% confidence intervals we  
210 bootstrapped the trials (in a stratified fashion, i.e., maintaining the factorial design of the  
211 conditions) and ran the regression model again, repeating this process 10,000 times.

212

213

214

## 215 **Results**

### 216 *Accuracy*

#### 217 **Target Present Trials**

218 Subject responses were overall highly accurate, with average accuracy in target present trials of  
219 93.29% CI: [92.80, 93.78] (see Fig 2). We found a significant main effect of set size ( $\chi^2$  (2) =  
220 75.01,  $p < .001$ ) and of target orientation ( $\chi^2$  (1) = 19.37,  $p < .001$ ). Subjects were more accurate  
221 when fewer distractors appeared on the screen (one distractor 96.09% [95.43, 96.74]; three  
222 distractors 93.62% [92.76, 94.41]; and five distractors 90.16% [89.14, 91.15]), and when faces  
223 were presented upright (upright 94.69% [94.06, 95.31]; inverted 91.89% [91.12, 92.63]). S1 File  
224 shows the  $\chi^2$  values for the other main and interaction terms.

225

#### 226 **Target Absent Trials**

227 Subject responses were also highly accurate on target absent trials, with average accuracy of  
228 97.09% [96.78, 97.41]. We found a significant main effect of set size ( $\chi^2$  (2) = 25.54,  $p < .001$ ),  
229 familiarity ( $\chi^2$  (1) = 6.75,  $p < .01$ ), and target orientation ( $\chi^2$  (1) = 16.54,  $p < .001$ ) but no other  
230 significant main or interaction effects (see S1 File). Subjects were more accurate at saying the  
231 target was absent when looking for a familiar face (familiar 97.59% [97.15, 98.00]; stranger  
232 96.60% [96.10, 97.08]) and when faces were presented upright (upright 97.85% [97.43, 98.25];  
233 inverted 96.34% [95.83, 96.82]). Subjects' accuracy was lower with six distractors (two

234 distractors 97.93% [97.47, 98.39]; four distractors 97.53% [97.01, 98.03]; and six distractors  
235 95.82% [95.16, 96.48]).

236 **Fig 2. Average accuracy according to target orientation (columns) and presence of the**  
237 **target (rows).** Subjects were overall highly accurate, with better performance when faces were  
238 presented upright and with fewer distractors. Red: familiar targets; Blue: stranger targets. Error  
239 bars show 95% bootstrapped confidence intervals.

## 240 *Reaction Times*

### 241 **Target Present Trials**

242 All main effects of interest were statistically significant: Set Size ( $\chi^2(2) = 1318.93$ ,  $p < .001$ ),  
243 Familiarity ( $\chi^2(1) = 169.61$ ,  $p < .001$ ), and Target Orientation ( $\chi^2(1) = 400.49$ ,  $p < .001$ ). We  
244 found significant interactions of Set Size x Familiarity ( $\chi^2(2) = 8.59$ ,  $p < .05$ ) reflecting faster  
245 reaction times for familiar face trials; of Familiarity x Target Orientation ( $\chi^2(1) = 9.16$ ,  $p < .001$ )  
246 reflecting a larger familiarity effect for upright faces, and Set Size x Familiarity x Target  
247 Orientation ( $\chi^2(2) = 11.17$ ,  $p < .001$ ) reflecting mostly a difference in the effect of familiarity on  
248 slopes for upright versus inverted faces (see S1 File).

249  
250 Subjects were overall faster when searching for a familiar face than a stranger face, and they  
251 were faster with upright faces than inverted faces (see Fig 3). The advantage for familiar faces  
252 was 114 ms [97, 131] in the upright condition, and 75 ms [55, 95] in the inverted condition, with  
253 a difference of 39 ms [13, 65]). Fig 4 shows the effect size of Familiarity at each set size.

254 These differences were further analyzed by looking at the estimates of Set Size 1 and slopes.  
255 With upright faces, the Set Size 1 estimates were 632 ms [615, 649] for familiar faces, and 683  
256 ms [663, 702] for stranger faces. With inverted faces, they were 699 ms [677, 722] for familiar  
257 and 783 ms [759, 806] for stranger faces. We found a nonsignificant trend towards a greater  
258 effect of familiarity for inverted faces: 51 ms [26, 77] for upright faces, and 83 ms [50, 116] for  
259 inverted faces (difference 33 ms [-10, 74]).

260

261 **Fig 3. Average reaction times according to presence of the target.** Subjects were always  
262 faster at determining the presence or absence of a familiar target face compared to a stranger  
263 target face. Solid lines show upright condition, dashed lines show inverted condition. Red:  
264 familiar targets; Blue: stranger targets. Error bars show 95% bootstrapped confidence intervals.

265

266 **Fig 4. Average unstandardized effect size of Familiarity for Upright and Inverted faces in**  
267 **Target Present and Absent trials.** Error bars show 95% bootstrapped confidence intervals.

268

269 The significant interaction terms in the linear mixed-effect model reflected differences in the  
270 search slopes. Search slope estimates were significantly lower for familiar faces in the upright  
271 condition: 87 ms/item [80, 94] vs. 108 ms/item [101, 116] for stranger faces (difference of 22  
272 ms/item [11, 32]). The search slopes for inverted faces were steeper than those for upright faces,  
273 and they did not differ across familiarity (familiar faces 122 ms/item [112, 130]; stranger faces  
274 116 ms/item [107, 125]; difference -4 ms/item [-17, 8]).

## 275 Target Absent Trials

276 All main effects of interest were significant: Set Size ( $\chi^2(2) = 8131.39, p < .001$ ), Familiarity ( $\chi^2$   
277 (2) = 414.31,  $p < .001$ ), and Target Orientation ( $\chi^2(2) = 792.64, p < .001$ ). The two-way  
278 interactions were significant, but the three-way interaction was not: Set Size x Familiarity ( $\chi^2(2)$   
279 = 6.59,  $p < .05$ ); Set Size x Target Orientation ( $\chi^2(2) = 6.20, p < .05$ ); and Familiarity x Target  
280 Orientation ( $\chi^2(1) = 6.75, p < .01$ ) (see S1 File). The average effect size for Familiarity was 122  
281 ms [110, 135] in the upright condition, and 103 ms [87, 118] in the inverted condition (difference  
282 20 ms [0, 40]). Fig 4 shows the effect size of Familiarity at each set size.

283

284 The search slopes in the target absent trials were about two times those in the target present  
285 trials, consistent with a serial self-terminating search. Interestingly, search slopes were steeper  
286 when subjects were looking for stranger targets, despite the distractors presented being the same  
287 in both familiar and stranger blocks. With upright faces, the search slope was 184 ms/item [178,  
288 189] for familiar targets and 210 ms/item [204, 215] for stranger targets (difference 26 ms [19,  
289 34]). The search slopes were steeper for inverted targets, but less so in familiar than stranger  
290 blocks (familiar: 210 ms/item [203, 216]; stranger: 237 ms/item [230, 243]; difference 27 ms  
291 [18, 36]).

## 292 Discussion

293 In this study subjects searched for friends' faces and strangers' faces in a visual search task. We  
294 found a processing advantage for personally familiar faces that was robust to face inversion.

295 Subjects' behavior could be framed in terms of a self-terminating serial search, with target-  
296 absent search slopes about twice the target-present ones. In target present trials subjects were  
297 highly accurate both with familiar and stranger targets, showing no evidence of a speed-accuracy  
298 trade-off.

299

300 Set Size 1 estimates showed that familiar face targets were processed faster than stranger target  
301 faces when presented both upright and inverted. This result adds to the evidence that personally  
302 familiar faces benefit from facilitated processing in a variety of experimental conditions [13–15]  
303 and real-life situations [7].

304

305 Critically, in this experiment we showed that the advantage of familiar face processing extended  
306 to inverted faces. Evidence suggests that turning a face upside-down reduces holistic perceptual  
307 processing and favors feature-based processing [18,19,24,25,29]; see also [20,21]. Thus, the  
308 faster detection of personally familiar faces in the inverted condition suggests that more efficient  
309 processing of personally familiar faces rests largely on enhanced processing of local facial  
310 features.

311

312 Our findings extend the theoretical relevance of the results by Tong and Nakayama (1999), who  
313 used subjects' own faces as familiar identities. By using faces of subjects' friends instead of  
314 subjects' own faces, we made the experimental task closer to everyday experience. We spend  
315 more time looking at the faces of other people, especially personally familiar others, than at



316 oneself, and we are more likely to search for a familiar face in a crowd rather than search for  
317 one's own face.

318

319 We found that the search slopes differed between familiar and stranger conditions for upright  
320 faces on target present trials, and for both upright and inverted faces on target absent trials, but  
321 not for inverted faces on target present trials. These results indicate that subjects were faster at  
322 rejecting a stranger distractor when looking for a familiar face target than when looking for a  
323 stranger face target, even in target absent trials, in which the stimulus arrays were equivalent for  
324 familiar target and unfamiliar target blocks. The increase of the reaction times based on the  
325 number of items in the search array is consistent with a serial self-terminating search that was  
326 faster when searching for familiar face targets than for stranger face targets. This indicates that  
327 the internal representation of a familiar face, against which each distractor is compared, is either  
328 more robust and precise or sparser. We propose that familiarity may direct processing to specific  
329 features that are diagnostic of a familiar face's identity, whereas the representation of a  
330 stranger's face does not focus processing on similar diagnostic features.

331

332 Our previous results support the hypothesis for a streamlined detection of familiar faces based on  
333 diagnostic, identity-specific features. We have shown that changes in eye gaze, a local feature  
334 that serves as a potent social cue, are detected faster when conveyed by personally familiar faces  
335 [14]. We also showed that personally familiar faces are distinguished from stranger faces in a  
336 saccadic reaction time task at a latency of 180ms [15]. This very rapid detection of familiarity is  
337 faster than the time required to build a view-invariant representation of faces the monkey face

338 patch system [48], further corroborating our hypothesis that rapid familiarity detection is based  
339 on a simpler, perhaps feature-based, process.

340

341 The slightly smaller effect of familiarity on reaction times for inverted faces than for upright  
342 faces, as reflected by the significant Familiarity x Orientation interaction, may suggest that some  
343 of the features of familiar face representations that afford more rapid processing are configural or  
344 holistic. However, the greater magnitude of the familiar advantage even for the inverted faces  
345 shows that this facilitation relies mainly on local features. Related work by others also indicates  
346 that configural information is less important for recognition of a familiar identity (see [12] for a  
347 cogent argument).

348

349 In summary, the results of our experiment add to the existing evidence that the human visual  
350 system is finely tuned for rapid detection and identification of familiar faces, much more so than  
351 of stranger faces. Participants searched for a familiar or stranger identity among distractors  
352 presented in either an upright or inverted orientation. They responded faster when searching for  
353 familiar faces even in the inverted condition. Taken together, our results suggest that robust  
354 representations for familiar faces contain information about idiosyncratic facial features that  
355 allow subjects to detect or reject identities when searching for a friend's face in a crowd of  
356 stranger faces.

## 357 **Acknowledgements**

358 We would like to thank Sebastian M. Frank, J. Swaroop Guntupalli, the members of the Gobbini  
359 lab and Haxby lab for helpful discussions on these results.

## 360 **References**

- 361 1. Balas B, Cox D, Conwell E. The effect of real-world personal familiarity on the speed of  
362 face information processing. *PLoS One*. 2007;2: e1223. doi:10.1371/journal.pone.0001223
- 363 2. Gobbini MI, Gors JD, Halchenko YO, Hughes HC, Cipolli C. Processing of invisible social  
364 cues. *Conscious Cogn*. Elsevier; 2013;22: 765–770. doi:10.1016/j.concog.2013.05.002
- 365 3. Gobbini MI, Haxby JV. Neural systems for recognition of familiar faces.  
366 *Neuropsychologia*. 2007;45: 32–41. doi:10.1016/j.neuropsychologia.2006.04.015
- 367 4. Haxby JV, Gobbini MI. Distributed neural systems for face perception. In: Calder A,  
368 Rhodes G, Johnson M, Haxby J, editors. *Oxford Handbook of Face Perception*. OUP  
369 Oxford; 2011. Available: <https://books.google.com/books?id=2UXx9rdfriQC>
- 370 5. Bruce V. Stability from variation: The case of face recognition the M.D. Vernon memorial  
371 lecture. *The Quarterly Journal of Experimental Psychology Section A*. Taylor & Francis;  
372 1994;47: 5–28. doi:10.1080/14640749408401141
- 373 6. Bruce V, Henderson Z, Newman C, Burton AM. Matching identities of familiar and  
374 unfamiliar faces caught on CCTV images. *J Exp Psychol Appl*. American Psychological  
375 Association; 2001;7: 207. Available: <http://psycnet.apa.org/journals/xap/7/3/207/>
- 376 7. Jenkins R, Burton AM. Stable face representations. *Philos Trans R Soc Lond B Biol Sci*.  
377 2011;366: 1671–1683. doi:10.1098/rstb.2010.0379
- 378 8. Burton AM, Wilson S, Cowan M, Bruce V. Face Recognition in Poor-Quality Video:  
379 Evidence From Security Surveillance. *Psychol Sci*. [pss.sagepub.com](http://pss.sagepub.com); 1999;10: 243–248.  
380 doi:10.1111/1467-9280.00144
- 381 9. Natu V, O’Toole AJ. The neural processing of familiar and unfamiliar faces: a review and  
382 synopsis. *Br J Psychol*. Wiley Online Library; 2011;102: 726–747. doi:10.1111/j.2044-  
383 8295.2011.02053.x

- 384 10. Jenkins R, White D, Van Montfort X, Mike Burton A. Variability in photos of the same  
385 face. *Cognition*. Elsevier; 2011;121: 313–323. doi:10.1016/j.cognition.2011.08.001
- 386 11. Ramon M, Van Belle G. Real-life experience with personally familiar faces enhances  
387 discrimination based on global information. *PeerJ*. peerj.com; 2016;4: e1465.  
388 doi:10.7717/peerj.1465
- 389 12. Burton AM, Schweinberger SR, Jenkins R, Kaufmann JM. Arguments Against a Configural  
390 Processing Account of Familiar Face Recognition. *Perspect Psychol Sci*. pps.sagepub.com;  
391 2015;10: 482–496. doi:10.1177/1745691615583129
- 392 13. Gobbini MI, Gors JD, Halchenko YO, Rogers C, Guntupalli JS, Hughes H, et al. Prioritized  
393 Detection of Personally Familiar Faces. *PLoS One*. journals.plos.org; 2013;8: e66620.  
394 doi:10.1371/journal.pone.0066620
- 395 14. Visconti di Oleggio Castello M, Guntupalli JS, Yang H, Gobbini MI. Facilitated detection  
396 of social cues conveyed by familiar faces. *Front Hum Neurosci*. Frontiers Media SA;  
397 2014;8: 1–11.
- 398 15. Visconti di Oleggio Castello M, Gobbini MI. Familiar Face Detection in 180ms. *PLoS One*.  
399 Public Library of Science; 2015;10: e0136548. doi:10.1371/journal.pone.0136548
- 400 16. Caharel S, Ramon M, Rossion B. Face familiarity decisions take 200 msec in the human  
401 brain: electrophysiological evidence from a go/no-go speeded task. *J Cogn Neurosci*.  
402 2014;26: 81–95. doi:10.1162/jocn\_a\_00451
- 403 17. Barragan-Jason G, Cauchoix M, Barbeau EJ. The neural speed of familiar face recognition.  
404 *Neuropsychologia*. 2015;75: 390–401. doi:10.1016/j.neuropsychologia.2015.06.017
- 405 18. Farah MJ, Tanaka JW, Drain HM. What causes the face inversion effect? *J Exp Psychol*  
406 *Hum Percept Perform*. psycnet.apa.org; 1995;21: 628–634. Available:  
407 <http://www.ncbi.nlm.nih.gov/pubmed/7790837>
- 408 19. Freire A, Lee K, Symons LA. The face-inversion effect as a deficit in the encoding of  
409 configural information: direct evidence. *Perception*. pec.sagepub.com; 2000;29: 159–170.  
410 Available: <http://www.ncbi.nlm.nih.gov/pubmed/10820599>
- 411 20. Valentine T. Upside-down faces: A review of the effect of inversion upon face recognition.  
412 *Br J Psychol*. Wiley Online Library; 1988;79: 471–491. Available:  
413 <http://onlinelibrary.wiley.com/doi/10.1111/j.2044-8295.1988.tb02747.x/full>
- 414 21. McKone E, Yovel G. Why does picture-plane inversion sometimes dissociate perception of  
415 features and spacing in faces, and sometimes not? Toward a new theory of holistic  
416 processing. *Psychon Bull Rev*. Springer; 2009;16: 778–797. doi:10.3758/PBR.16.5.778

- 417 22. Rossion B. Distinguishing the cause and consequence of face inversion: the perceptual field  
418 hypothesis. *Acta Psychol. Elsevier*; 2009;132: 300–312. doi:10.1016/j.actpsy.2009.08.002
- 419 23. Xu B, Tanaka JW. Does face inversion qualitatively change face processing: an eye  
420 movement study using a face change detection task. *J Vis. jov.arvojournals.org*; 2013;13.  
421 doi:10.1167/13.2.22
- 422 24. Rossion B. Picture-plane inversion leads to qualitative changes of face perception. *Acta*  
423 *Psychol. Elsevier*; 2008;128: 274–289. doi:10.1016/j.actpsy.2008.02.003
- 424 25. Leder H, Bruce V. When inverted faces are recognized: the role of configural information in  
425 face recognition. *Q J Exp Psychol A. Taylor & Francis*; 2000;53: 513–536.  
426 doi:10.1080/713755889
- 427 26. Robbins R, McKone E. No face-like processing for objects-of-expertise in three behavioural  
428 tasks. *Cognition. Elsevier*; 2007;103: 34–79. doi:10.1016/j.cognition.2006.02.008
- 429 27. Rossion B, Gauthier I. How does the brain process upright and inverted faces? *Behav Cogn*  
430 *Neurosci Rev. bcn.sagepub.com*; 2002;1: 63–75. Available:  
431 <https://www.ncbi.nlm.nih.gov/pubmed/17715586>
- 432 28. Le Grand R, Mondloch CJ, Maurer D, Brent HP. Neuroperception. Early visual experience  
433 and face processing. *Nature. nature.com*; 2001;410: 890. doi:10.1038/35073749
- 434 29. Yin RK. Looking at upside-down faces. *J Exp Psychol. American Psychological*  
435 *Association*; 1969;81: 141. doi:10.1037/h0027474
- 436 30. Haxby JV, Ungerleider LG, Clark VP, Schouten JL, Hoffman EA, Martin A. The effect of  
437 face inversion on activity in human neural systems for face and object perception. *Neuron.*  
438 1999;22: 189–199. Available: <https://www.ncbi.nlm.nih.gov/pubmed/10027301>
- 439 31. Young AW, Hellawell D, Hay DC. Configurational information in face perception.  
440 *Perception. 1987*;16: 747–759. Available: <https://www.ncbi.nlm.nih.gov/pubmed/3454432>
- 441 32. Diamond R, Carey S. Why faces are and are not special: An effect of expertise. *J Exp*  
442 *Psychol Gen. American Psychological Association*; 1986;115: 107. doi:10.1037/0096-  
443 3445.115.2.107
- 444 33. Rhodes G. Looking at faces: first-order and second-order features as determinants of facial  
445 appearance. *Perception. 1988*;17: 43–63. Available:  
446 <https://www.ncbi.nlm.nih.gov/pubmed/3205669>
- 447 34. Piepers D, Robbins R. A review and clarification of the terms “holistic,” “configural,” and  
448 “relational” in the face perception literature. *Front Psychol. Frontiers*; 2012;3: 559.

- 449 Available: <http://journal.frontiersin.org/article/10.3389/fpsyg.2012.00559/full>
- 450 35. Tanaka JW, Farah MJ. Parts and wholes in face recognition. *Q J Exp Psychol A*. 1993;46:  
451 225–245. Available: <https://www.ncbi.nlm.nih.gov/pubmed/8316637>
- 452 36. Maurer D, Grand RL, Mondloch CJ. The many faces of configural processing. *Trends Cogn*  
453 *Sci*. 2002;6: 255–260. Available: <https://www.ncbi.nlm.nih.gov/pubmed/12039607>
- 454 37. Willenbockel V, Sadr J, Fiset D, Horne GO, Gosselin F, Tanaka JW. Controlling low-level  
455 image properties: the SHINE toolbox. *Behav Res Methods*. 2010;42: 671–684.  
456 doi:10.3758/BRM.42.3.671
- 457 38. Bates D, Mächler M, Bolker B, Walker S. Fitting Linear Mixed-Effects Models Using lme4.  
458 *J Stat Softw*. 2015;67: 1–48. doi:10.18637/jss.v067.i01
- 459 39. Fox J, Weisberg S. An R Companion to Applied Regression [Internet]. SAGE Publications;  
460 2010. Available: <https://books.google.com/books?id=I9eiNeME8ukC>
- 461 40. Wickham H, Francois R. dplyr: A grammar of data manipulation. R package version 04.  
462 user2014.stat.ucla.edu; 2015; Available:  
463 [http://user2014.stat.ucla.edu/abstracts/talks/45\\_Wickham.pdf](http://user2014.stat.ucla.edu/abstracts/talks/45_Wickham.pdf)
- 464 41. Wickham H. ggplot2: Elegant Graphics for Data Analysis [Internet]. Springer New York;  
465 2010. Available: <https://market.android.com/details?id=book-rhRqtQAACAAJ>
- 466 42. Analytics R, Weston S. Foreach: provides foreach looping construct for R. R package  
467 version. 2015;
- 468 43. Xie Y. knitr: a comprehensive tool for reproducible research in R. Implement Reprod Res.  
469 books.google.com; 2014;
- 470 44. Xie Y. Dynamic Documents with R and knitr, Second Edition [Internet]. CRC Press; 2015.
- 471 45. Xie Y. knitr: A general-purpose package for dynamic report generation in R. R package  
472 version. 2013;
- 473 46. Jaeger TF. Categorical Data Analysis: Away from ANOVAs (transformation or not) and  
474 towards Logit Mixed Models. *J Mem Lang*. 2008;59: 434–446.  
475 doi:10.1016/j.jml.2007.11.007
- 476 47. Efron B, Tibshirani RJ. An Introduction to the Bootstrap. Taylor & Francis; 1994.
- 477 48. Freiwald WA, Tsao DY. Functional compartmentalization and viewpoint generalization  
478 within the macaque face-processing system. *Science*. science.sciencemag.org; 2010;330:  
479 845–851. doi:10.1126/science.1194908

480 **Figures**

481 Figure 1.

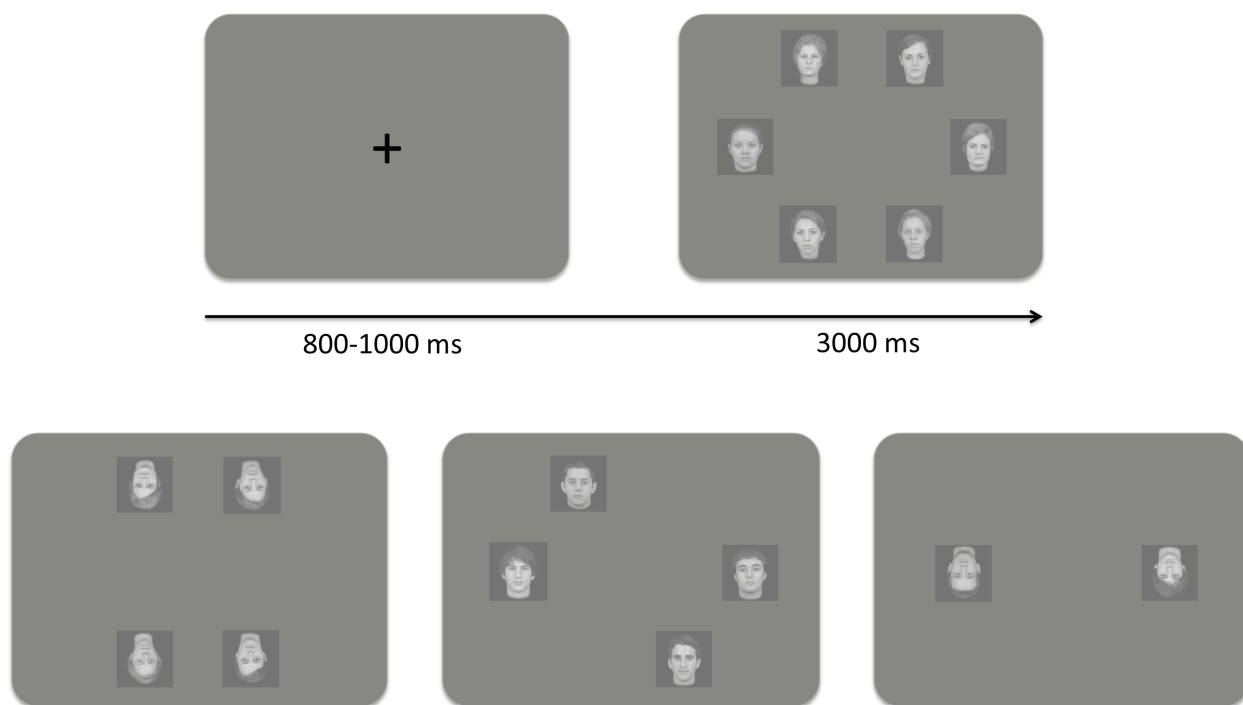

482

483 Figure 2

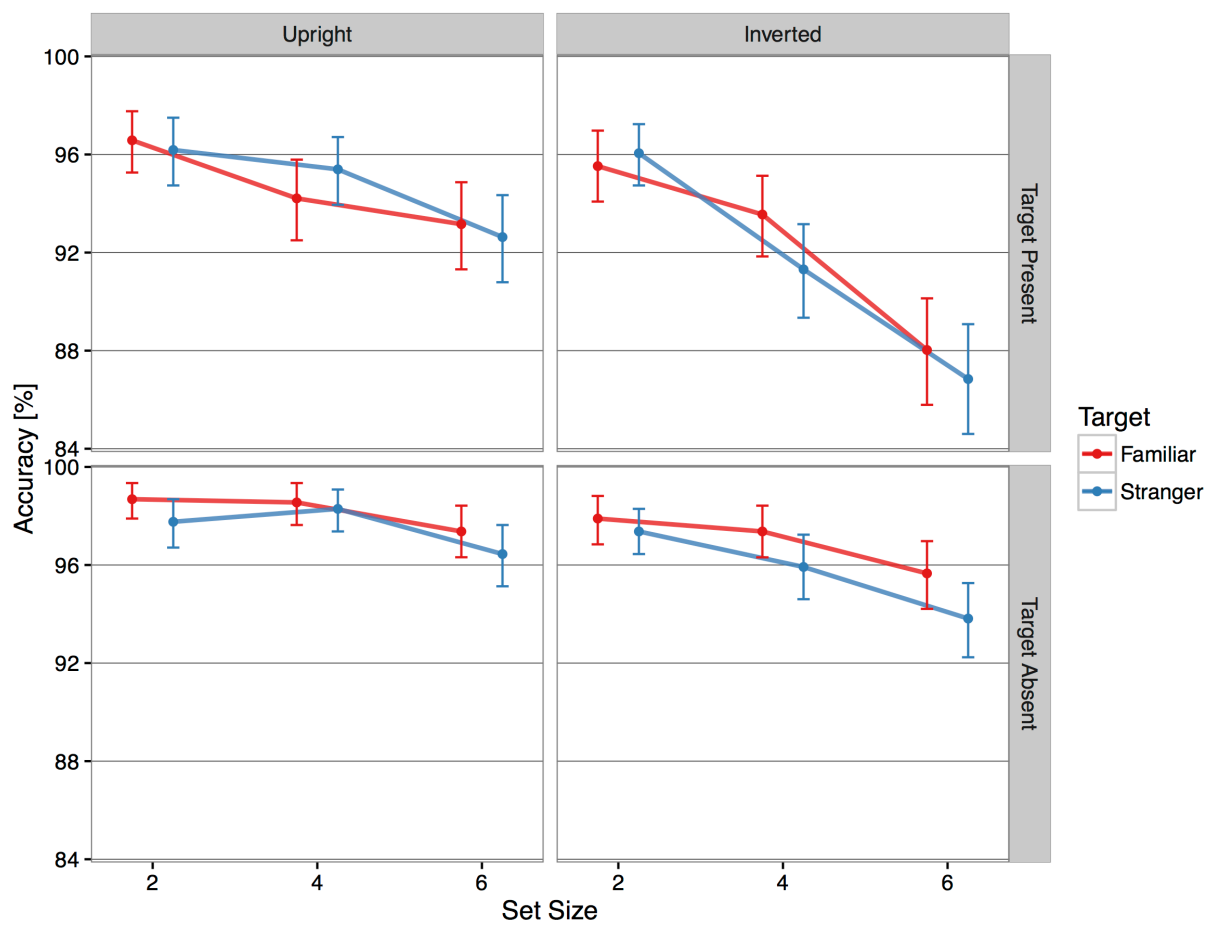

484

485



486 Figure 3.

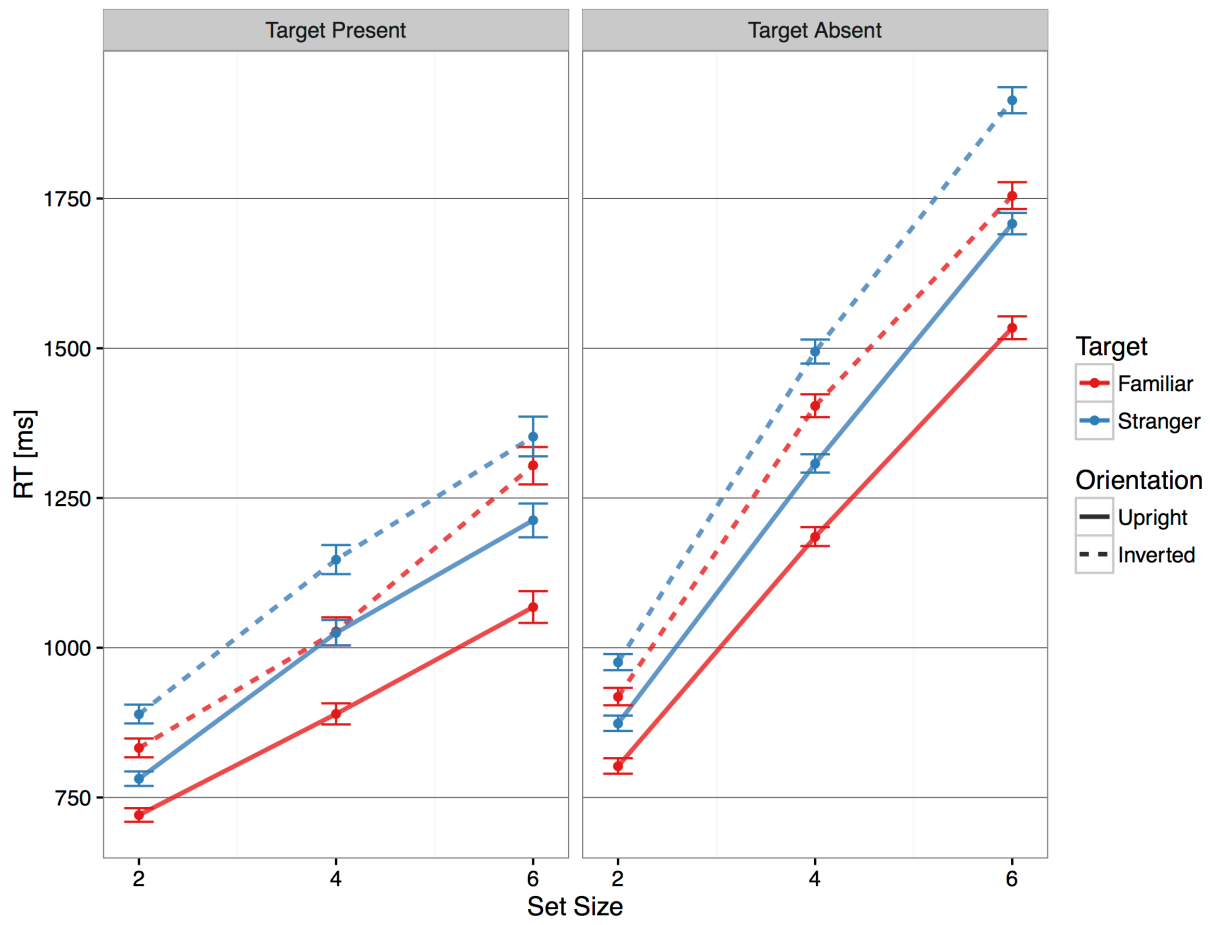

487

488

489 Figure 4.

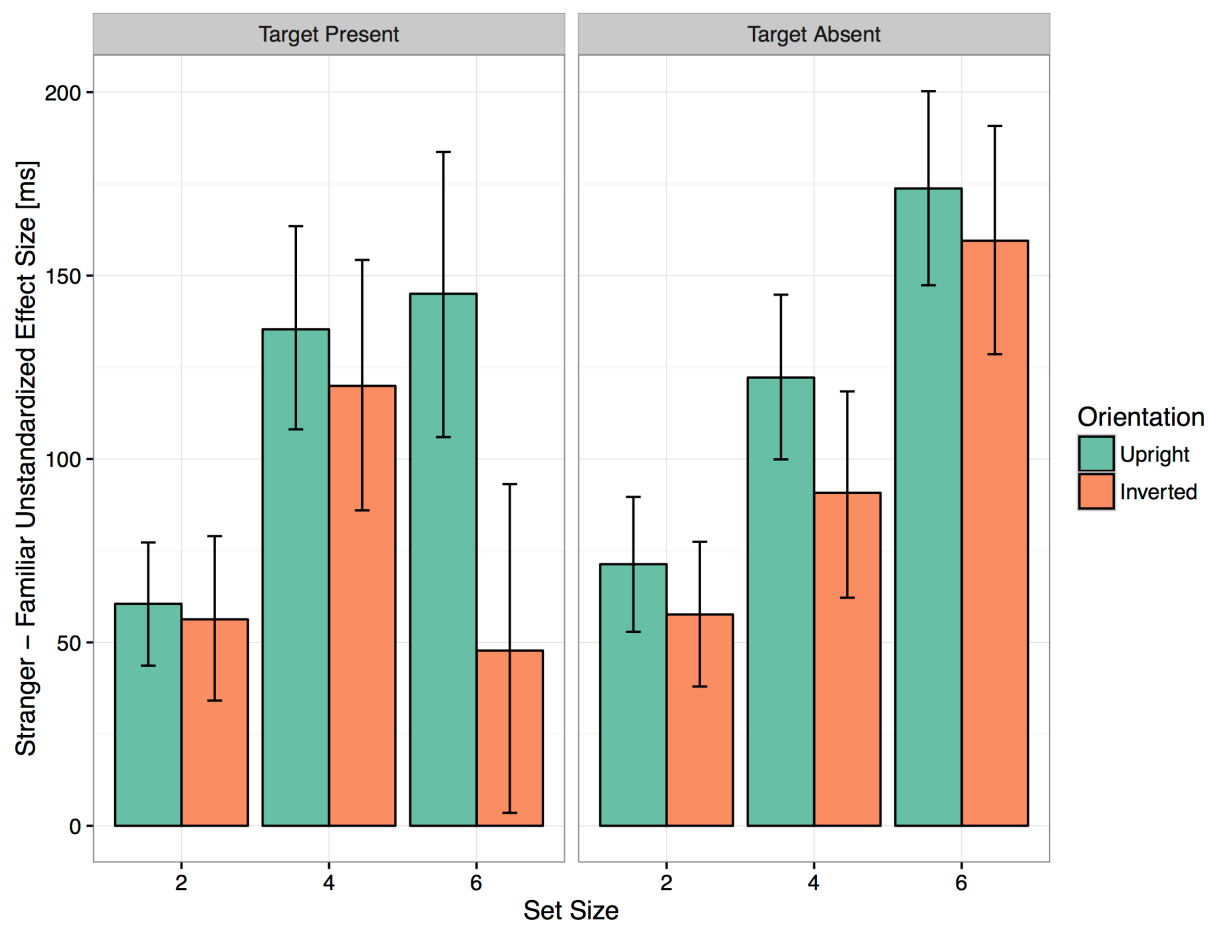

490

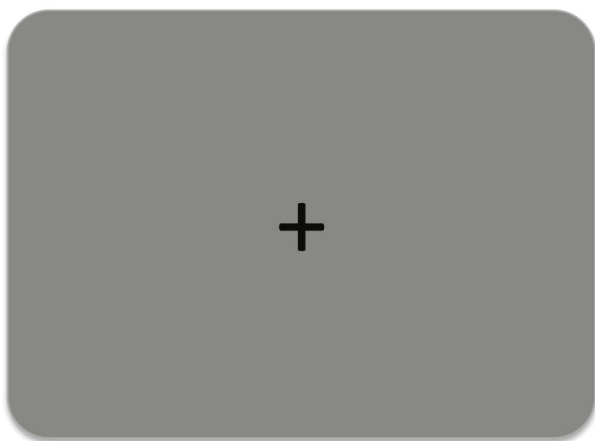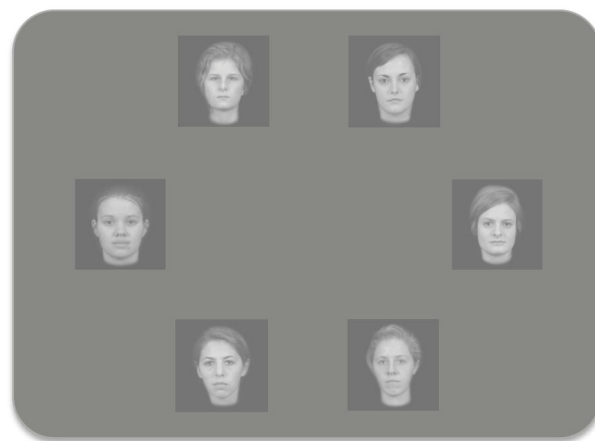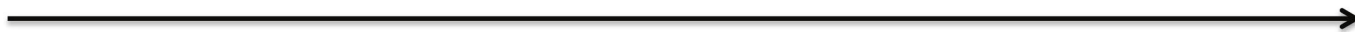

800-1000 ms

3000 ms

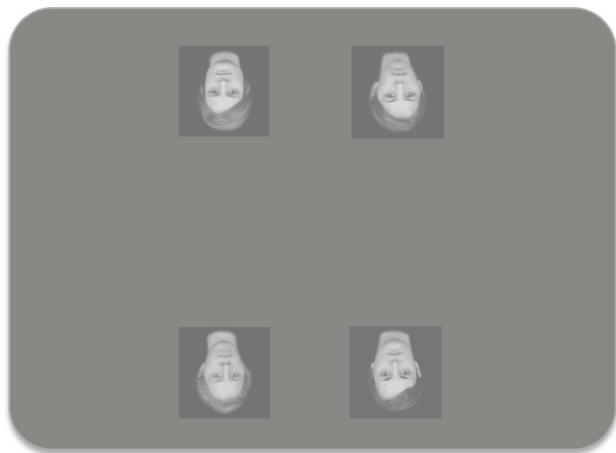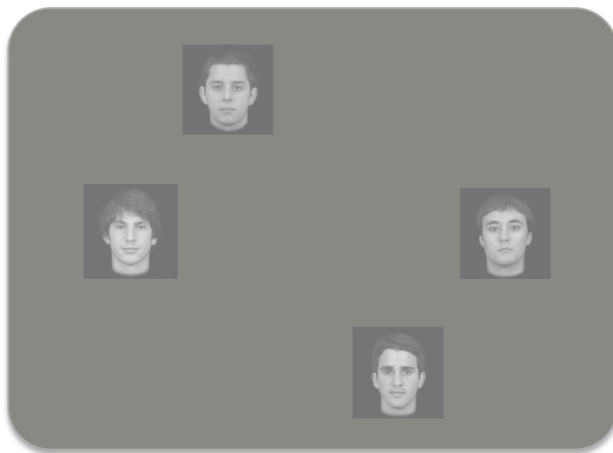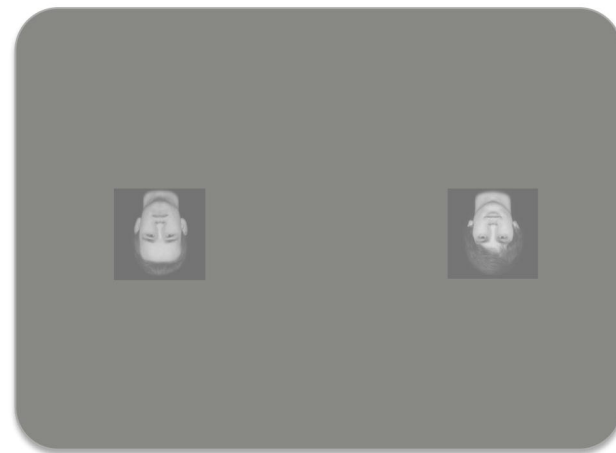

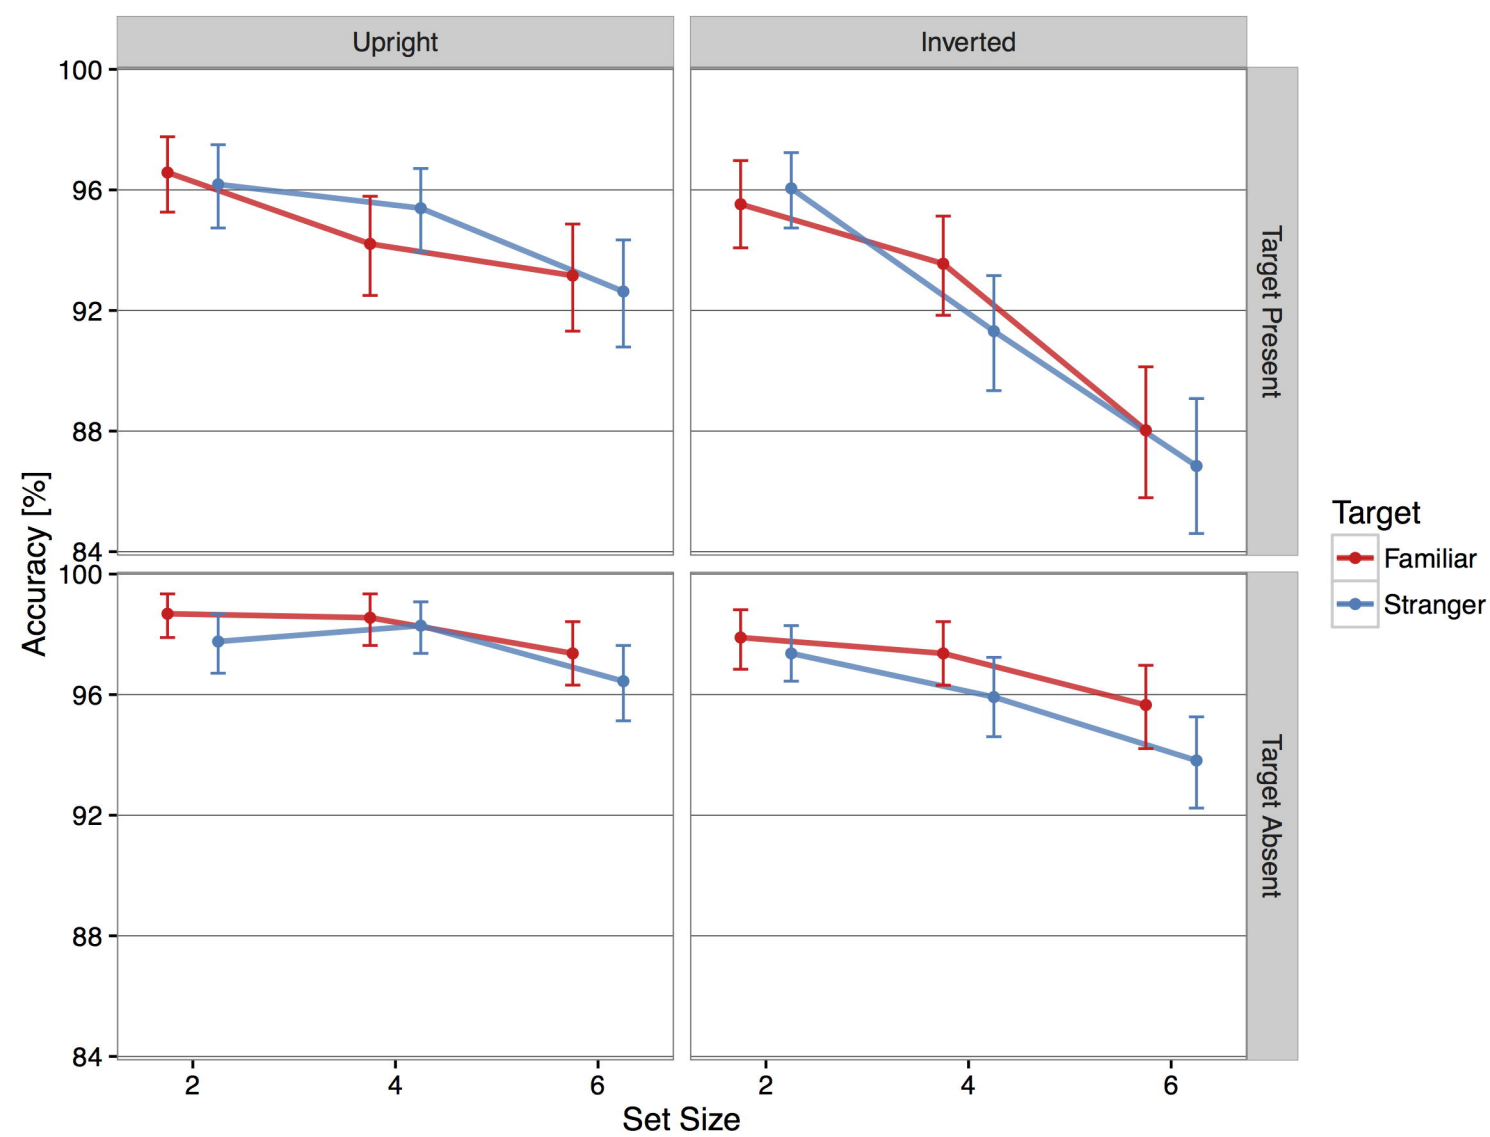

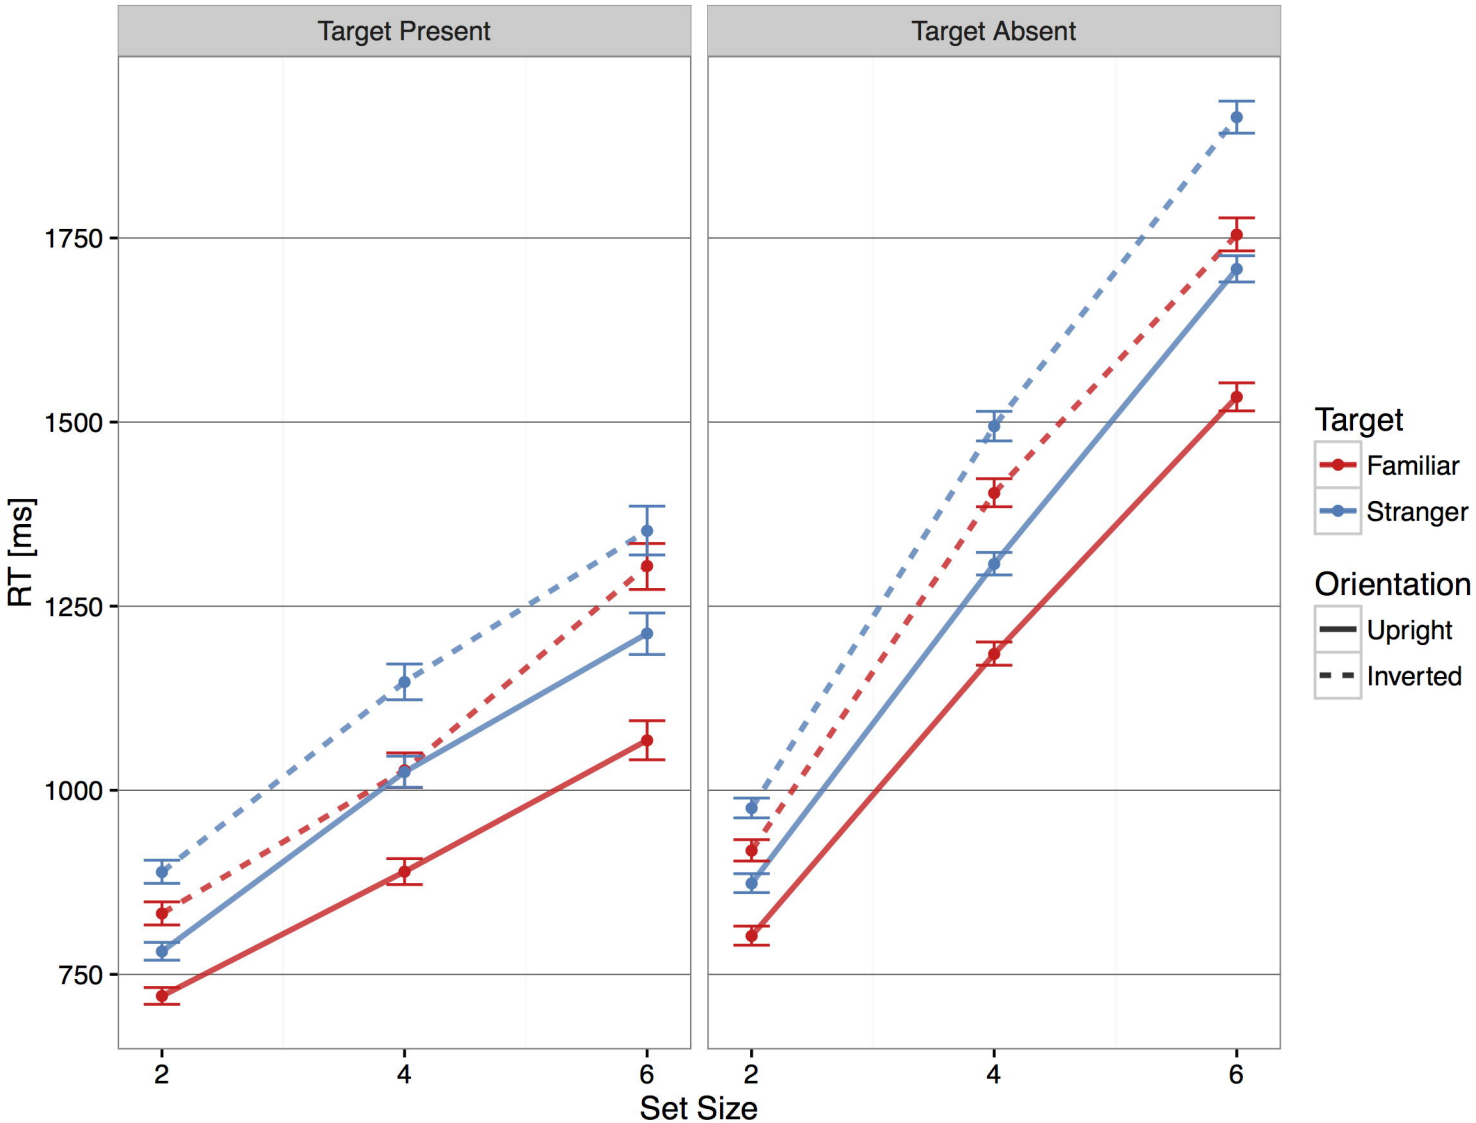

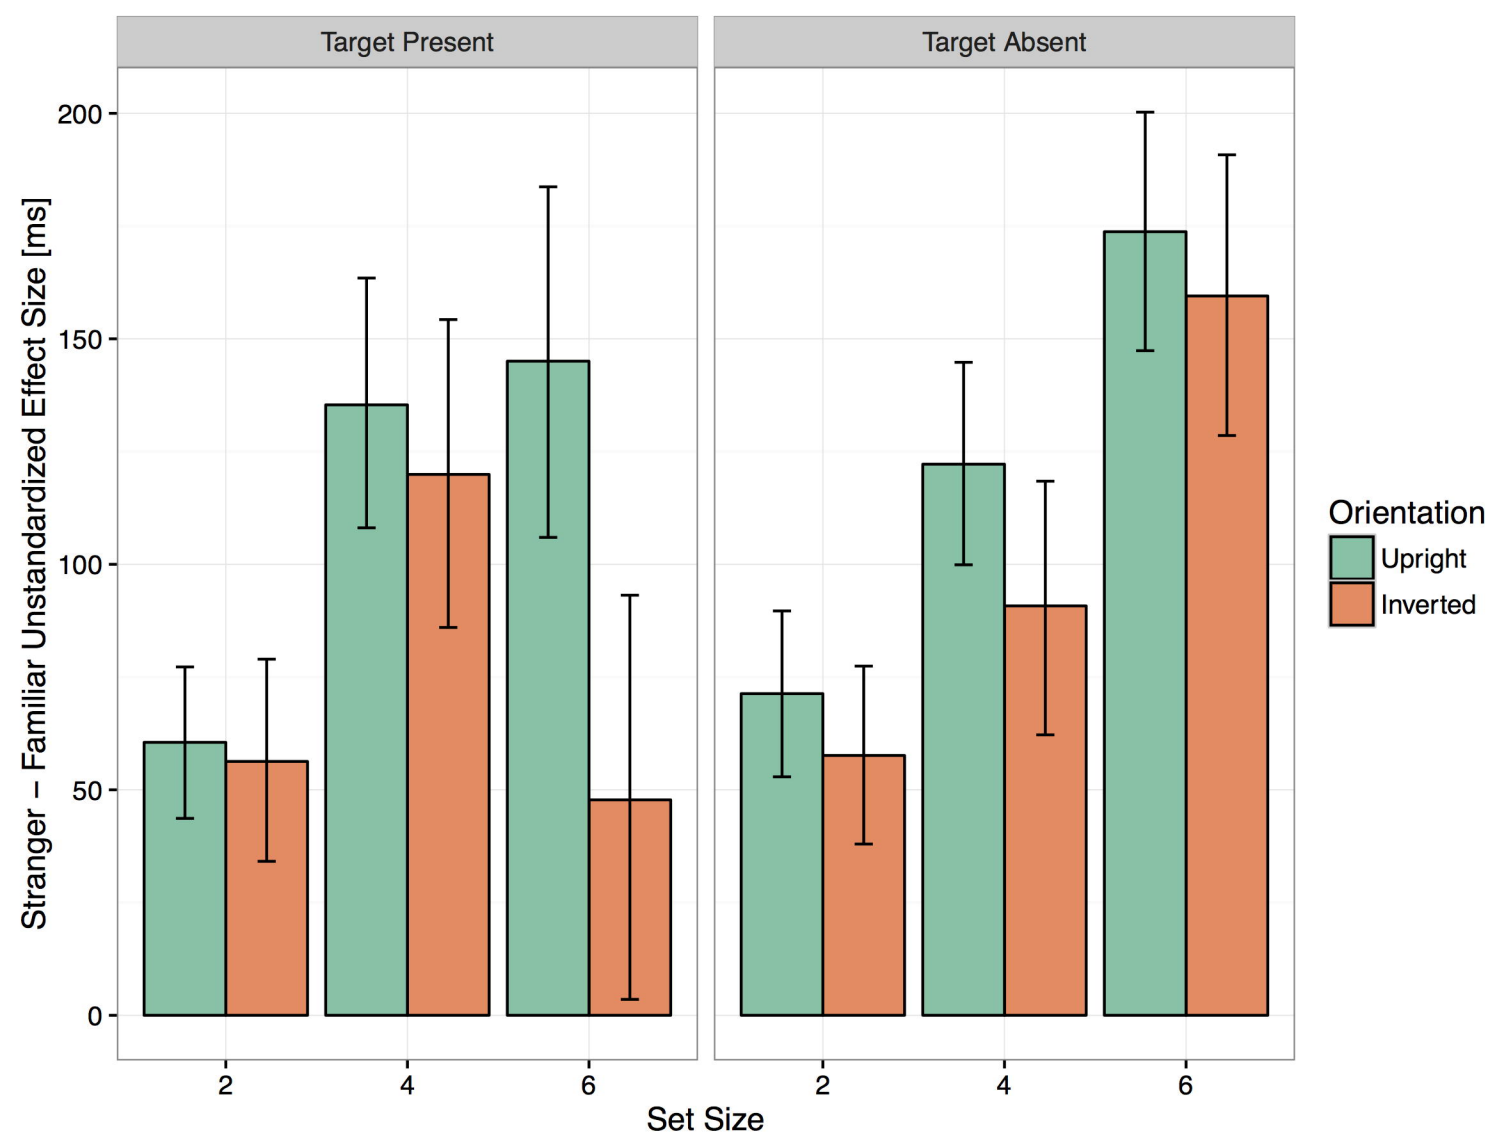

Source: http://biorxiv.org/content/10.1101/058537v3.full.pdf
